# Supplementary material
Source: MDPI journal article supplement (https://www.mdpi.com/2624-5647/6/1/8)
Supplement: s1 [file s1]

SUPPLEMENTARY FILES:

Tables S1

**ROB 2 Table 3**

| Authors                    | Measurement of the outcome; Gastrointestinal Symptoms                                                                                                                                                                                                                                                                                                                                                                                                                                                                                                                                                                            |
|----------------------------|----------------------------------------------------------------------------------------------------------------------------------------------------------------------------------------------------------------------------------------------------------------------------------------------------------------------------------------------------------------------------------------------------------------------------------------------------------------------------------------------------------------------------------------------------------------------------------------------------------------------------------|
|                            | <p>4.1. Was the method of measuring the outcome inappropriate?<br/><b>No</b></p> <p>4.2. Could measurement or ascertainment of the outcome have differed between intervention groups? <b>No</b></p> <p>4.3. If N/PN/NI to 4.1 and 4.2: Were outcome assessors aware of the intervention received by study participants?<br/><b>No</b></p> <p>4.4. If Y/PY/NI to 4.3: Could assessment of the outcome have been influenced by knowledge of intervention received?</p> <p>4.5. If Y/PY/NI to 4.4: Is it likely that assessment of the outcome was influenced by knowledge of intervention received?</p> <p>Overall: <b>LOW</b></p> |
| Smecuol et al., 2013       |                                                                                                                                                                                                                                                                                                                                                                                                                                                                                                                                                                                                                                  |
|                            | <p>4.1. <b>No</b></p> <p>4.2. <b>No</b></p> <p>4.3. <b>No</b></p> <p>4.4.</p> <p>4.5.</p> <p>Overall: <b>LOW</b></p>                                                                                                                                                                                                                                                                                                                                                                                                                                                                                                             |
| Olivares et al., 2014      |                                                                                                                                                                                                                                                                                                                                                                                                                                                                                                                                                                                                                                  |
| Klemenak et al., 2015      | : <b>NOT MEASURED</b>                                                                                                                                                                                                                                                                                                                                                                                                                                                                                                                                                                                                            |
| Harnett et al., 2016       | : <b>NOT MEASURED</b>                                                                                                                                                                                                                                                                                                                                                                                                                                                                                                                                                                                                            |
| Quagliariello et al., 2016 | : <b>NOT MEASURED</b>                                                                                                                                                                                                                                                                                                                                                                                                                                                                                                                                                                                                            |
| Primec et al., 2019        | : <b>NOT MEASURED</b>                                                                                                                                                                                                                                                                                                                                                                                                                                                                                                                                                                                                            |
|                            | <p>4.1. <b>No</b></p> <p>4.2. <b>No</b></p> <p>4.3. <b>No</b></p> <p>4.4.</p> <p>4.5.</p> <p>Overall: <b>LOW</b></p>                                                                                                                                                                                                                                                                                                                                                                                                                                                                                                             |
| Francavilla et al., 2019   |                                                                                                                                                                                                                                                                                                                                                                                                                                                                                                                                                                                                                                  |
|                            | <p>4.1. <b>No</b></p> <p>4.2. <b>No</b></p> <p>4.3.</p> <p>4.4.</p> <p>4.5.</p> <p>Overall: <b>LOW</b></p>                                                                                                                                                                                                                                                                                                                                                                                                                                                                                                                       |
| Smecuol et al., 2019       |                                                                                                                                                                                                                                                                                                                                                                                                                                                                                                                                                                                                                                  |
|                            | <p>4.1. <b>PY</b></p> <p>4.2. <b>PY</b></p> <p>4.3. <b>PY</b></p> <p>4.4. <b>NI</b></p> <p>4.5. <b>PY</b></p> <p>Overall: <b>HIGH</b></p>                                                                                                                                                                                                                                                                                                                                                                                                                                                                                        |
| Ali et al., 2022           |                                                                                                                                                                                                                                                                                                                                                                                                                                                                                                                                                                                                                                  |

## Tables S2

**ROB 2 Table 4**

| Authors                    | Measurement of the outcome; Inflammatory Markers                                                                              |
|----------------------------|-------------------------------------------------------------------------------------------------------------------------------|
| Smecuol et al., 2013       | 4.1. Was the method of measuring the outcome inappropriate?<br><b>No</b>                                                      |
|                            | 4.2. Could measurement or ascertainment of the outcome have differed between intervention groups? <b>No</b>                   |
|                            | 4.3. If N/PN/NI to 4.1 and 4.2: Were outcome assessors aware of the intervention received by study participants?<br><b>PN</b> |
|                            | 4.4. If Y/PY/NI to 4.3: Could assessment of the outcome have been influenced by knowledge of intervention received? <b>No</b> |
|                            | 4.5. If Y/PY/NI to 4.4: Is it likely that assessment of the outcome was influenced by knowledge of intervention received?     |
|                            | Overall: <b>LOW</b>                                                                                                           |
| Olivares et al., 2014      | 4.1. <b>No</b>                                                                                                                |
|                            | 4.2. <b>No</b>                                                                                                                |
|                            | 4.3. <b>No</b>                                                                                                                |
|                            | 4.4.                                                                                                                          |
|                            | 4.5.                                                                                                                          |
|                            | Overall: <b>LOW</b>                                                                                                           |
| Klemenak et al., 2015      | 4.1. <b>No</b>                                                                                                                |
|                            | 4.2. <b>No</b>                                                                                                                |
|                            | 4.3. <b>No</b>                                                                                                                |
|                            | 4.4.                                                                                                                          |
|                            | 4.5.                                                                                                                          |
|                            | Overall: <b>LOW</b>                                                                                                           |
| Harnett et al., 2016       | <b>NOT MEASURED</b>                                                                                                           |
| Quagliariello et al., 2016 | <b>NOT MEASURED</b>                                                                                                           |
| Primec et al., 2019        | <b>NOT MEASURED</b>                                                                                                           |
| Francavilla et al., 2019   | <b>NOT MEASURED</b>                                                                                                           |
| Smecuol et al., 2019       | <b>NOT MEASURED</b>                                                                                                           |
| Ali et al., 2022           | <b>NOT MEASURED</b>                                                                                                           |
