# Supplementary material
Source: MDPI journal article supplement (https://www.mdpi.com/2624-5647/6/1/8)
Supplement: s1 [file s1]

Archive with 1 entries (1 files):
- gastrointestdisord-2772897-supplementary.pdf
